# Supplementary material for: ccML, a new mark-up language to improve ISO/EN 13606-based electronic health record extracts practical edition
Source: PubMed Central journal article supplement — J Am Med Inform Assoc. 2012 Sep 27;20(2):298–304. doi: 10.1136/amiajnl-2011-000722 (PMC3638171; doi:10.1136/amiajnl-2011-000722), 2012-09-27
Supplement: amiajnl-2011-000722-s1.pdf [file amiajnl-2011-000722-s1.pdf]

## Appendix

This appendix contains a sample of three different EN13606 EHR extracts as the XML files generated by the Extracts Editor application system used in this research.

It is a sample of a small study (50 extracts) mainly intended to perform a statistical calculation on the proportion of medico-legal context information out of the total information generated during the process of creation of the extracts.

The data generated in the three following XML files has been marked with three different colors. Data marked in yellow have been introduced automatically by the system as direct consequence of the ccML file subsystem and corresponds in the vast majority to the medico-legal context information, though there are a few exceptions, i.e. medical domain data from archetypes that are generated automatically, like for instance measurement units in certain physical quantities.

In blue and green colors stand the data closely related to the medical task being performed by the healthcare professional using the editor system *and not* having been automatically generated by the ccML subsystem: blue color corresponds to data automatically generated by the editor's standard system, while green color stands for data explicitly introduced by the user, i.e. manually, even when this might be done by selecting a list box of given values using the mouse.

The proportion of data introduced by ccML has been computed as the total number of yellow marked data out of the total number of marked data, and the results yield an average of 74.5% with a standard deviation of 2.3% for the collection of 50 extracts.

We thus consider in this paper that the proportion of medico-legal context information stands around 70% of the total amount of data, and as a consequence the automation of the process of generation of this information is very interesting.

**Extract 1.** It uses archetype CEN-EN13606\_PITES-Entry.Heart\_rate.v1.

```
<?xml version="1.0" encoding="UTF-8" standalone="yes"?>
<ns3:EHRExtract xmlns:ns2="uri:iso.org:21090"
xmlns:ns3="http://www.iso.org/iso/search.htm?qt=13606">
<ehrId extension="001.001.002.00000001" root="2.16.724.4.21" validTimeHigh="30000101"
validTimeLow="20110204"/>
  <ehrSystem extension="001.001.001.0000000001" root="2.16.724.4.21"
validTimeHigh="30000101" validTimeLow="20110204"/>
  <rmlId>EN 13606</rmlId>
  <subjectOfCare extension="001.001.004.002" root="2.16.724.4.21" validTimeHigh="30000101"
validTimeLow="20110204"/>
  <timeCreated>2012-03-07T12:54:44</timeCreated>
  <allCompositions>
    <meaning codingRationale="" codeSystemName="Project PITES Coding System"
codeSystem="PITES_CS_V01B" code="003.01.0001">
      <ns2:displayName value="Heart diagnosis"/>
    </meaning>
    <name codingRationale="">
      <ns2:displayName value="Heart diagnosis"/>
    </name>
    <rclId extension="2012:03:07:12:54:48:1" root="2.16.724.4.21" validTimeHigh="30000101"
validTimeLow="20110204"/>
    <synthesised>false</synthesised>
    <content xsi:type="ns3:Entry" xmlns:xsi="http://www.w3.org/2001/XMLSchema-instance">
      <archetypeId extension="CEN-EN13606_PITES-Entry.Heart_rate.v1.adl"/>
      <meaning codingRationale="" codeSystemName="Project PITES Coding System"
codeSystem="HUPH-ISCIll" code="01010101000009">
        <ns2:displayName value="Heart Rate"/>
      </meaning>
      <name codingRationale="">
        <ns2:displayName value="Heart Rate"/>
      </name>
      <rclId extension="2012:03:07:12:55:01:2" root="2.16.724.4.21" validTimeHigh="30000101"
validTimeLow="20110204"/>
      <synthesised>false</synthesised>
      <uncertaintyExpressed>false</uncertaintyExpressed>
      <items xsi:type="ns3:Element">
        <meaning codingRationale="" codeSystemName="Project PITES Coding System"
codeSystem="HUPH-ISCIll" code="01010101000010">
          <ns2:displayName value="Heart rate measurement"/>
        </meaning>
        <name codingRationale="">
          <ns2:displayName value="Heart rate measurement"/>
        </name>
        <rclId extension="2012:03:07:12:57:23:3" root="2.16.724.4.21"
validTimeHigh="30000101" validTimeLow="20110204"/>
        <synthesised>false</synthesised>
        <value xsi:type="ns2:PQ" unit="bpm" codingRationale="" precision="0" value="76.0"/>
      </items>
      <items xsi:type="ns3:Element">
        <meaning codingRationale="" codeSystemName="Project PITES Coding System"
codeSystem="HUPH-ISCIll" code="01010101000003">
          <ns2:displayName value="State of patient"/>
        </meaning>
      </items>
    </content>
  </allCompositions>
</EHRExtract>
```

```

<name codingRationale="">
  <ns2:displayName value="State of patient"/>
</name>
<rclid extension="2012:03:07:12:58:30:4" root="2.16.724.4.21"
validTimeHigh="30000101" validTimeLow="20110204"/>
<synthesised>false</synthesised>
<value xsi:type="ns2:ST" value="Position of patient at measurement"/>
</items>
<items xsi:type="ns3:Element">
  <meaning codingRationale="" codeSystemName="Project PITES Coding System"
codeSystem="HUPH-ISCI||" code="01010101000004">
    <ns2:displayName value="Position of patient"/>
  </meaning>
  <name codingRationale="">
    <ns2:displayName value="Position of patient"/>
  </name>
  <rclid extension="2012:03:07:12:59:04:5" root="2.16.724.4.21"
validTimeHigh="30000101" validTimeLow="20110204"/>
  <synthesised>false</synthesised>
  <value xsi:type="ns2:ST" value="lying"/>
</items>
<items xsi:type="ns3:Element">
  <meaning codingRationale="" codeSystemName="Project PITES Coding System"
codeSystem="HUPH-ISCI||" code="01010101000005">
    <ns2:displayName value="Place of measurement"/>
  </meaning>
  <name codingRationale="">
    <ns2:displayName value="Place of measurement"/>
  </name>
  <rclid extension="2012:03:07:12:59:32:6" root="2.16.724.4.21"
validTimeHigh="30000101" validTimeLow="20110204"/>
  <synthesised>false</synthesised>
  <value xsi:type="ns2:ST" value="wrist"/>
</items>
<items xsi:type="ns3:Element">
  <meaning codingRationale="" codeSystemName="Project PITES Coding System"
codeSystem="HUPH-ISCI||" code="01010101000006">
    <ns2:displayName value="Measurement device"/>
  </meaning>
  <name codingRationale="">
    <ns2:displayName value="Measurement device"/>
  </name>
  <rclid extension="2012:03:07:13:00:17:7" root="2.16.724.4.21"
validTimeHigh="30000101" validTimeLow="20110204"/>
  <synthesised>false</synthesised>
  <value xsi:type="ns2:ST" value="electrocardiograph"/>
</items>
</content>
</allCompositions>
</ns3:EHRExtract>

```

**Extract 2.** It uses archetype CEN-EN13606\_PITES-Entry.Respiratory\_rate.v1.

```
<?xml version="1.0" encoding="UTF-8" standalone="yes"?>
<ns3:EHRExtract xmlns:ns2="uri:iso.org:21090"
xmlns:ns3="http://www.iso.org/iso/search.htm?qt=13606">
  <ehrId extension="001.001.002.000000002" root="2.16.724.4.21" validTimeHigh="30000101"
validTimeLow="20110204"/>
  <ehrSystem extension="001.001.001.0000000001" root="2.16.724.4.21"
validTimeHigh="30000101" validTimeLow="20110204"/>
  <rmlId>EN 13606</rmlId>
  <subjectOfCare extension="001.001.004.002" root="2.16.724.4.21" validTimeHigh="30000101"
validTimeLow="20110204"/>
  <timeCreated>2012-03-13T16:13:44</timeCreated>
  <allCompositions>
    <meaning codingRationale="" codeSystemName="Project PITES Coding System"
codeSystem="PITES_CS_V01B" code="003.01.0001">
      <ns2:displayName value="Respiratory test"/>
    </meaning>
    <name codingRationale="">
      <ns2:displayName value="Respiratory test"/>
    </name>
    <rclId extension="2012:03:13:16:13:47:1" root="2.16.724.4.21" validTimeHigh="30000101"
validTimeLow="20110204"/>
    <synthesised>false</synthesised>
    <content xsi:type="ns3:Entry" xmlns:xsi="http://www.w3.org/2001/XMLSchema-instance">
      <archetypeId extension="CEN-EN13606_PITES-Entry.Respiratory_rate.v1.adl"/>
      <meaning codingRationale="" codeSystemName="Project PITES Coding System"
codeSystem="PITES_CS_V01B" code="003.03.0001">
        <ns2:displayName value="Respiratory rate"/>
      </meaning>
      <name codingRationale="">
        <ns2:displayName value="Respiratory rate"/>
      </name>
      <rclId extension="2012:03:13:16:13:58:2" root="2.16.724.4.21" validTimeHigh="30000101"
validTimeLow="20110204"/>
      <synthesised>false</synthesised>
      <uncertaintyExpressed>false</uncertaintyExpressed>
      <items xsi:type="ns3:Element">
        <meaning codingRationale="" codeSystemName="Project PITES Coding System"
codeSystem="PITES_CS_V01B" code="003.04.0001">
          <ns2:displayName value="Respiratory rate measurement"/>
        </meaning>
        <name codingRationale="">
          <ns2:displayName value="Respiratory rate measurement"/>
        </name>
        <rclId extension="2012:03:13:16:14:03:3" root="2.16.724.4.21"
validTimeHigh="30000101" validTimeLow="20110204"/>
        <synthesised>false</synthesised>
        <value xsi:type="ns2:PQ" unit="/min" codingRationale="" precision="0" value="5.2"/>
      </items>
      <items xsi:type="ns3:Element">
        <meaning codingRationale="" codeSystemName="Project PITES Coding System"
codeSystem="PITES_CS_V01B" code="003.04.0002">
          <ns2:displayName value="Position of patient"/>
        </meaning>
      </items>
    </content>
  </allCompositions>
</EHRExtract>
```

```
</meaning>
<name codingRationale="">
  <ns2:displayName value="Position of patient"/>
</name>
<rclid extension="2012:03:13:16:15:34:4" root="2.16.724.4.21"
validTimeHigh="30000101" validTimeLow="20110204"/>
<synthesised>false</synthesised>
<value xsi:type="ns2:ST" value="Standing"/>
</items>
<items xsi:type="ns3:Element">
  <meaning codingRationale="" codeSystemName="Project PITES Coding System"
codeSystem="PITES_CS_V01B" code="003.04.0003">
    <ns2:displayName value="Method of measurement"/>
  </meaning>
  <name codingRationale="">
    <ns2:displayName value="Method of measurement"/>
  </name>
  <rclid extension="2012:03:13:16:16:03:5" root="2.16.724.4.21"
validTimeHigh="30000101" validTimeLow="20110204"/>
  <synthesised>false</synthesised>
  <value xsi:type="ns2:ST" value="Manual, no device"/>
</items>
</content>
</allCompositions>
</ns3:EHRExtract>
```

**Extract 3.** It uses archetype CEN-EN13606\_21090\_PITES-Section.Heart\_self-test.v1. This archetype uses in turn the following nested archetypes:

- CEN-EN13606\_21090\_PITES-Entry.Blood\_pressure.v1
- CEN-EN13606\_21090\_PITES-Entry.Human\_weight.v1
- CEN-EN13606\_21090\_PITES-Entry.Oxygen\_saturation\_in\_blood.v1
- CEN-EN13606\_21090\_PITES-Entry. Respiratory\_rate.v1

```
<?xml version="1.0" encoding="UTF-8" standalone="yes"?>
<ns3:EHRExtract xmlns:ns2="uri.iso.org:21090"
xmlns:ns3="http://www.iso.org/iso/search.htm?qt=13606">
  <ehrId extension="001.001.002.000000003" root="2.16.724.4.21" validTimeHigh="30000101"
validTimeLow="20110204"/>
  <ehrSystem extension="001.001.001.0000000001" root="2.16.724.4.21"
validTimeHigh="30000101" validTimeLow="20110204"/>
  <rmlId>EN 13606</rmlId>
  <subjectOfCare extension="001.001.004.002" root="2.16.724.4.21" validTimeHigh="30000101"
validTimeLow="20110204"/>
  <timeCreated>2012-03-13T16:20:26</timeCreated>
  <allCompositions>
    <meaning codingRationale="" codeSystemName="Project PITES Coding System"
codeSystem="PITES_CS_V01B" code="003.01.0001">
      <ns2:displayName value="Heart_self-test"/>
    </meaning>
    <name codingRationale="">
      <ns2:displayName value="Heart_self-test"/>
    </name>
    <rclId extension="2012:03:13:16:20:32:1" root="2.16.724.4.21" validTimeHigh="30000101"
validTimeLow="20110204"/>
    <synthesised>false</synthesised>
    <content xsi:type="ns3:Section" xmlns:xsi="http://www.w3.org/2001/XMLSchema-instance">
      <archetypeId extension="CEN-EN13606_21090_PITES-Section.Heart_self-test.v1.adl"/>
      <meaning codingRationale="" codeSystemName="Project PITES Coding System"
codeSystem="HUPH-ISCIll" code="01010101000034">
        <ns2:displayName value="Heart self-test"/>
      </meaning>
      <name codingRationale="">
        <ns2:displayName value="Heart self-test"/>
      </name>
      <rclId extension="2012:03:13:16:22:02:2" root="2.16.724.4.21" validTimeHigh="30000101"
validTimeLow="20110204"/>
      <synthesised>false</synthesised>
      <members xsi:type="ns3:Entry">
        <meaning codingRationale="" codeSystemName="Project PITES Coding System"
codeSystem="HUPH-ISCIll" code="01010101000035">
          <ns2:displayName value="Questionnaire"/>
        </meaning>
        <name codingRationale="">
          <ns2:displayName value="Questionnaire"/>
        </name>
        <rclId extension="2012:03:13:16:22:31:3" root="2.16.724.4.21"
validTimeHigh="30000101" validTimeLow="20110204"/>
        <synthesised>false</synthesised>
        <uncertaintyExpressed>false</uncertaintyExpressed>
```

```

<items xsi:type="ns3:Element">
  <meaning codingRationale="" codeSystemName="Project PITES Coding System"
codeSystem="HUPH-ISCIll" code="01010101000017">
    <ns2:displayName value="Fasting"/>
  </meaning>
  <name codingRationale="">
    <ns2:displayName value="Fasting"/>
  </name>
  <rclid extension="2012:03:13:16:22:49:4" root="2.16.724.4.21"
validTimeHigh="30000101" validTimeLow="20110204"/>
  <synthesised>false</synthesised>
  <value xsi:type="ns2:BL" value="true"/>
</items>
<items xsi:type="ns3:Element">
  <meaning codingRationale="" codeSystemName="Project PITES Coding System"
codeSystem="HUPH-ISCIll" code="01010101000036">
    <ns2:displayName value="Correct medicine take"/>
  </meaning>
  <name codingRationale="">
    <ns2:displayName value="Correct medicine take"/>
  </name>
  <rclid extension="2012:03:13:16:23:48:5" root="2.16.724.4.21"
validTimeHigh="30000101" validTimeLow="20110204"/>
  <synthesised>false</synthesised>
  <value xsi:type="ns2:BL" value="true"/>
</items>
<items xsi:type="ns3:Element">
  <meaning codingRationale="" codeSystemName="Project PITES Coding System"
codeSystem="HUPH-ISCIll" code="01010101000037">
    <ns2:displayName value="Sleeping time"/>
  </meaning>
  <name codingRationale="">
    <ns2:displayName value="Sleeping time"/>
  </name>
  <rclid extension="2012:03:13:16:24:13:6" root="2.16.724.4.21"
validTimeHigh="30000101" validTimeLow="20110204"/>
  <synthesised>false</synthesised>
  <value xsi:type="ns2:PQ" unit="horas" codingRationale="" precision="0" value="9.0"/>
</items>
</members>
<members xsi:type="ns3:Entry">
  <archetypeld extension="CEN-EN13606_21090_PITES-Entry.Blood_pressure.v1.adl"/>
  <meaning codingRationale="" codeSystemName="Project PITES Coding System"
codeSystem="HUPH-ISCIll" code="01010101000001">
    <ns2:displayName value="Blood pressure"/>
  </meaning>
  <name codingRationale="">
    <ns2:displayName value="Blood pressure"/>
  </name>
  <rclid extension="2012:03:13:16:24:56:7" root="2.16.724.4.21"
validTimeHigh="30000101" validTimeLow="20110204"/>
  <synthesised>false</synthesised>
  <uncertaintyExpressed>false</uncertaintyExpressed>
  <items xsi:type="ns3:Cluster">
    <meaning codingRationale="" codeSystemName="Project PITES Coding System"
codeSystem="HUPH-ISCIll" code="01010101000003">

```

```

        <ns2:displayName value="State of patient"/>
    </meaning>
    <name codingRationale="">
        <ns2:displayName value="State of patient"/>
    </name>
    <rclid extension="2012:03:13:16:26:35:11" root="2.16.724.4.21"
    validTimeHigh="30000101" validTimeLow="20110204"/>
    <synthesised>false</synthesised>
    <parts xsi:type="ns3:Element">
        <meaning codingRationale="" codeSystemName="Project PITES Coding System"
    codeSystem="HUPH-ISCI||" code="01010101000007">
            <ns2:displayName value="Systolic"/>
        </meaning>
        <name codingRationale="">
            <ns2:displayName value="Systolic"/>
        </name>
        <rclid extension="2012:03:13:16:25:18:9" root="2.16.724.4.21"
    validTimeHigh="30000101" validTimeLow="20110204"/>
        <synthesised>false</synthesised>
        <value xsi:type="ns2:PQ" unit="mm[Hg]" codingRationale="" precision="0"
    value="12.0"/>
    </parts>
    <parts xsi:type="ns3:Element">
        <meaning codingRationale="" codeSystemName="Project PITES Coding System"
    codeSystem="HUPH-ISCI||" code="01010101000008">
            <ns2:displayName value="Diastolic"/>
        </meaning>
        <name codingRationale="">
            <ns2:displayName value="Diastolic"/>
        </name>
        <rclid extension="2012:03:13:16:26:00:10" root="2.16.724.4.21"
    validTimeHigh="30000101" validTimeLow="20110204"/>
        <synthesised>false</synthesised>
        <value xsi:type="ns2:PQ" unit="mm[Hg]" codingRationale="" precision="0"
    value="5.0"/>
    </parts>
</items>
<items xsi:type="ns3:Element">
    <meaning codingRationale="" codeSystemName="Project PITES Coding System"
    codeSystem="HUPH-ISCI||" code="01010101000004">
        <ns2:displayName value="Position of patient"/>
    </meaning>
    <name codingRationale="">
        <ns2:displayName value="Position of patient"/>
    </name>
    <rclid extension="2012:03:13:16:27:03:12" root="2.16.724.4.21"
    validTimeHigh="30000101" validTimeLow="20110204"/>
    <synthesised>false</synthesised>
    <value xsi:type="ns2:ST" value="Sitting"/>
</items>
<items xsi:type="ns3:Element">
    <meaning codingRationale="" codeSystemName="Project PITES Coding System"
    codeSystem="HUPH-ISCI||" code="01010101000005">
        <ns2:displayName value="Place of measurement"/>
    </meaning>
    <name codingRationale="">

```



```

        <ns2:displayName value="Place of measurement"/>
    </name>
    <rcld extension="2012:03:13:16:27:23:13" root="2.16.724.4.21"
validTimeHigh="30000101" validTimeLow="20110204"/>
    <synthesised>false</synthesised>
    <value xsi:type="ns2:ST" value="arm"/>
</items>
<items xsi:type="ns3:Element">
    <meaning codingRationale="" codeSystemName="Project PITES Coding System"
codeSystem="HUPH-ISCI||" code="01010101000006">
        <ns2:displayName value="Method of measurement"/>
    </meaning>
    <name codingRationale="">
        <ns2:displayName value="Method of measurement"/>
    </name>
    <rcld extension="2012:03:13:16:27:52:14" root="2.16.724.4.21"
validTimeHigh="30000101" validTimeLow="20110204"/>
    <synthesised>false</synthesised>
    <value xsi:type="ns2:ST" value="electronic esfigmanometro"/>
</items>
<items xsi:type="ns3:Element">
    <synthesised>false</synthesised>
</items>
</members>
<members xsi:type="ns3:Entry">
    <archetypeld extension="CEN-EN13606_21090_PITES-Entry.Human_weight.v1.adl"/>
    <meaning codingRationale="" codeSystemName="Project PITES Coding System"
codeSystem="HUPH-ISCI||" code="01010101000022">
        <ns2:displayName value="Human_weight"/>
    </meaning>
    <name codingRationale="">
        <ns2:displayName value="Human_weight"/>
    </name>
    <rcld extension="2012:03:13:16:29:00:15" root="2.16.724.4.21"
validTimeHigh="30000101" validTimeLow="20110204"/>
    <synthesised>false</synthesised>
    <uncertaintyExpressed>false</uncertaintyExpressed>
    <items xsi:type="ns3:Element">
        <meaning codingRationale="" codeSystemName="Project PITES Coding System"
codeSystem="HUPH-ISCI||" code="01010101000028">
            <ns2:displayName value="Existence of pathologies"/>
        </meaning>
        <name codingRationale="">
            <ns2:displayName value="Existence of pathologies"/>
        </name>
        <rcld extension="2012:03:13:16:30:28:21" root="2.16.724.4.21"
validTimeHigh="30000101" validTimeLow="20110204"/>
        <synthesised>false</synthesised>
        <value xsi:type="ns2:BL" value="true"/>
    </items>
    <items xsi:type="ns3:Cluster">
        <meaning codingRationale="" codeSystemName="Project PITES Coding System"
codeSystem="HUPH-ISCI||" code="01010101000017">
            <ns2:displayName value="Fasting"/>
        </meaning>
        <name codingRationale="">

```

```

        <ns2:displayName value="Fasting"/>
    </name>
    <rclid extension="2012:03:13:16:32:10:25" root="2.16.724.4.21"
validTimeHigh="30000101" validTimeLow="20110204"/>
    <synthesised>false</synthesised>
    <parts xsi:type="ns3:Element">
        <meaning codingRationale="" codeSystemName="Project PITES Coding System"
codeSystem="HUPH-ISCI||" code="01010101000031">
            <ns2:displayName value="Existence of pharmacological treatment"/>
        </meaning>
        <name codingRationale="">
            <ns2:displayName value="Existence of pharmacological treatment"/>
        </name>
        <rclid extension="2012:03:13:16:31:07:23" root="2.16.724.4.21"
validTimeHigh="30000101" validTimeLow="20110204"/>
            <synthesised>false</synthesised>
            <value xsi:type="ns2:BL" value="false"/>
        </parts>
        <parts xsi:type="ns3:Element">
            <meaning codingRationale="" codeSystemName="Project PITES Coding System"
codeSystem="HUPH-ISCI||" code="01010101000032">
                <ns2:displayName value="Description of pharmacological treatment"/>
            </meaning>
            <name codingRationale="">
                <ns2:displayName value="Description of pharmacological treatment"/>
            </name>
            <rclid extension="2012:03:13:16:31:25:24" root="2.16.724.4.21"
validTimeHigh="30000101" validTimeLow="20110204"/>
                <synthesised>false</synthesised>
                <value xsi:type="ns2:ST" value="Chronic"/>
            </parts>
        </items>
        <items xsi:type="ns3:Cluster">
            <meaning codingRationale="" codeSystemName="Project PITES Coding System"
codeSystem="HUPH-ISCI||" code="01010101000033">
                <ns2:displayName value="Time of measurement"/>
            </meaning>
            <name codingRationale="">
                <ns2:displayName value="Time of measurement"/>
            </name>
            <rclid extension="2012:03:13:16:32:37:26" root="2.16.724.4.21"
validTimeHigh="30000101" validTimeLow="20110204"/>
                <synthesised>false</synthesised>
            </items>
            <items xsi:type="ns3:Element">
                <synthesised>false</synthesised>
            </items>
            <items xsi:type="ns3:Element">
                <synthesised>false</synthesised>
            </items>
        </members>
        <members xsi:type="ns3:Entry">
            <archetypeld extension="CEN-EN13606_21090_PITES-
Entry.Oxygen_saturation_in_blood.v1.adl"/>
            <meaning codingRationale="" codeSystemName="Project PITES Coding System"
codeSystem="HUPH-ISCI||" code="01010101000015">

```

```

    <ns2:displayName value="Oxygen_saturation_in_blood"/>
  </meaning>
  <name codingRationale="">
    <ns2:displayName value="Oxygen_saturation_in_blood"/>
  </name>
  <rclid extension="2012:03:13:16:33:13:27" root="2.16.724.4.21"
  validTimeHigh="30000101" validTimeLow="20110204"/>
  <synthesised>false</synthesised>
  <uncertaintyExpressed>false</uncertaintyExpressed>
  <items xsi:type="ns3:Cluster">
    <meaning codingRationale="" codeSystemName="Project PITES Coding System"
  codeSystem="HUPH-ISCI" code="01010101000003">
      <ns2:displayName value="State of patient"/>
    </meaning>
    <name codingRationale="">
      <ns2:displayName value="State of patient"/>
    </name>
    <rclid extension="2012:03:13:16:34:49:32" root="2.16.724.4.21"
  validTimeHigh="30000101" validTimeLow="20110204"/>
    <synthesised>false</synthesised>
    <parts xsi:type="ns3:Element">
      <meaning codingRationale="" codeSystemName="Project PITES Coding System"
    codeSystem="HUPH-ISCI" code="01010101000019">
        <ns2:displayName value="Arterial"/>
      </meaning>
      <name codingRationale="">
        <ns2:displayName value="Arterial"/>
      </name>
      <rclid extension="2012:03:13:16:33:28:29" root="2.16.724.4.21"
    validTimeHigh="30000101" validTimeLow="20110204"/>
        <synthesised>false</synthesised>
        <value xsi:type="ns2:PQ" unit="%" codingRationale="" precision="0" value="78.0"/>
      </parts>
      <parts xsi:type="ns3:Element">
        <meaning codingRationale="" codeSystemName="Project PITES Coding System"
    codeSystem="HUPH-ISCI" code="01010101000020">
            <ns2:displayName value="Venous"/>
          </meaning>
          <name codingRationale="">
            <ns2:displayName value="Venous"/>
          </name>
          <rclid extension="2012:03:13:16:34:04:30" root="2.16.724.4.21"
    validTimeHigh="30000101" validTimeLow="20110204"/>
              <synthesised>false</synthesised>
              <value xsi:type="ns2:PQ" unit="%" codingRationale="" precision="0" value="58.0"/>
            </parts>
            <parts xsi:type="ns3:Element">
              <meaning codingRationale="" codeSystemName="Project PITES Coding System"
    codeSystem="HUPH-ISCI" code="01010101000021">
                  <ns2:displayName value="Capillary"/>
                </meaning>
                <name codingRationale="">
                  <ns2:displayName value="Capillary"/>
                </name>
                <rclid extension="2012:03:13:16:34:26:31" root="2.16.724.4.21"
    validTimeHigh="30000101" validTimeLow="20110204"/>

```

```

        <synthesised>false</synthesised>
        <value xsi:type="ns2:PQ" unit="%" codingRationale="" precision="0" value="67.0"/>
    </parts>
</items>
<items xsi:type="ns3:Element">
    <meaning codingRationale="" codeSystemName="Project PITES Coding System"
codeSystem="HUPH-ISCI||" code="01010101000017">
        <ns2:displayName value="Fasting"/>
    </meaning>
    <name codingRationale="">
        <ns2:displayName value="Fasting"/>
    </name>
    <rclid extension="2012:03:13:16:35:20:33" root="2.16.724.4.21"
validTimeHigh="30000101" validTimeLow="20110204"/>
    <synthesised>false</synthesised>
    <value xsi:type="ns2:BL" value="false"/>
</items>
<items xsi:type="ns3:Element">
    <meaning codingRationale="" codeSystemName="Project PITES Coding System"
codeSystem="HUPH-ISCI||" code="01010101000005">
        <ns2:displayName value="Place of measurement"/>
    </meaning>
    <name codingRationale="">
        <ns2:displayName value="Place of measurement"/>
    </name>
    <rclid extension="2012:03:13:16:35:49:34" root="2.16.724.4.21"
validTimeHigh="30000101" validTimeLow="20110204"/>
    <synthesised>false</synthesised>
    <value xsi:type="ns2:ST" value="Exterior jugular vein"/>
</items>
<items xsi:type="ns3:Element">
    <meaning codingRationale="" codeSystemName="Project PITES Coding System"
codeSystem="HUPH-ISCI||" code="01010101000018">
        <ns2:displayName value="Puncture method"/>
    </meaning>
    <name codingRationale="">
        <ns2:displayName value="Puncture method"/>
    </name>
    <rclid extension="2012:03:13:16:36:30:35" root="2.16.724.4.21"
validTimeHigh="30000101" validTimeLow="20110204"/>
    <synthesised>false</synthesised>
    <value xsi:type="ns2:ST" value="lumbar puncture"/>
</items>
<items xsi:type="ns3:Element">
    <synthesised>false</synthesised>
</items>
</members>
<members xsi:type="ns3:Entry">
    <archetypeld extension="CEN-EN13606_21090_PITES-Entry. Respiratory_rate.v1.adl"/>
    <meaning codingRationale="" codeSystemName="Project PITES Coding System"
codeSystem="HUPH-ISCI||" code="01010101000011">
        <ns2:displayName value="Respiratory_rate"/>
    </meaning>
    <name codingRationale="">
        <ns2:displayName value="Respiratory_rate"/>
    </name>

```

```

    <rcld extension="2012:03:13:16:37:36:36" root="2.16.724.4.21"
    validTimeHigh="30000101" validTimeLow="20110204"/>
    <synthesised>false</synthesised>
    <uncertaintyExpressed>false</uncertaintyExpressed>
    <items xsi:type="ns3:Element">
      <meaning codingRationale="" codeSystemName="Project PITES Coding System"
    codeSystem="HUPH-ISCI||" code="01010101000012">
        <ns2:displayName value="Measurement of respiratory rate"/>
      </meaning>
      <name codingRationale="">
        <ns2:displayName value="Measurement of respiratory rate"/>
      </name>
      <rcld extension="2012:03:13:16:37:43:37" root="2.16.724.4.21"
    validTimeHigh="30000101" validTimeLow="20110204"/>
      <synthesised>false</synthesised>
      <value xsi:type="ns2:PQ" unit="/min" codingRationale="" precision="0" value="5.2"/>
    </items>
    <items xsi:type="ns3:Element">
      <meaning codingRationale="" codeSystemName="Project PITES Coding System"
    codeSystem="HUPH-ISCI||" code="01010101000013">
        <ns2:displayName value="Respiratory rate"/>
      </meaning>
      <name codingRationale="">
        <ns2:displayName value="Respiratory rate"/>
      </name>
      <rcld extension="2012:03:13:16:38:14:38" root="2.16.724.4.21"
    validTimeHigh="30000101" validTimeLow="20110204"/>
      <synthesised>false</synthesised>
      <value xsi:type="ns2:ST" value="irregular rythm"/>
    </items>
    <items xsi:type="ns3:Element">
      <meaning codingRationale="" codeSystemName="Project PITES Coding System"
    codeSystem="HUPH-ISCI||" code="01010101000014">
        <ns2:displayName value="Respiratory depth"/>
      </meaning>
      <name codingRationale="">
        <ns2:displayName value="Respiratory depth"/>
      </name>
      <rcld extension="2012:03:13:16:38:27:39" root="2.16.724.4.21"
    validTimeHigh="30000101" validTimeLow="20110204"/>
      <synthesised>false</synthesised>
      <value xsi:type="ns2:ST" value="normal respiration"/>
    </items>
    <items xsi:type="ns3:Element">
      <meaning codingRationale="" codeSystemName="Project PITES Coding System"
    codeSystem="HUPH-ISCI||" code="01010101000003">
        <ns2:displayName value="State of patient"/>
      </meaning>
      <name codingRationale="">
        <ns2:displayName value="State of patient"/>
      </name>
      <rcld extension="2012:03:13:16:38:44:40" root="2.16.724.4.21"
    validTimeHigh="30000101" validTimeLow="20110204"/>
      <synthesised>false</synthesised>
      <value xsi:type="ns2:ST" value="resting"/>
    </items>

```

```

<items xsi:type="ns3:Element">
  <meaning codingRationale="" codeSystemName="Project PITES Coding System"
codeSystem="HUPH-ISCIll" code="01010101000005">
    <ns2:displayName value="Place of measurement"/>
  </meaning>
  <name codingRationale="">
    <ns2:displayName value="Place of measurement"/>
  </name>
  <rclid extension="2012:03:13:16:38:58:41" root="2.16.724.4.21"
validTimeHigh="30000101" validTimeLow="20110204"/>
  <synthesised>false</synthesised>
  <value xsi:type="ns2:ST" value="thorax"/>
</items>
<items xsi:type="ns3:Element">
  <meaning codingRationale="" codeSystemName="Project PITES Coding System"
codeSystem="HUPH-ISCIll" code="01010101000004">
    <ns2:displayName value="Position of patient"/>
  </meaning>
  <name codingRationale="">
    <ns2:displayName value="Position of patient"/>
  </name>
  <rclid extension="2012:03:13:16:39:10:42" root="2.16.724.4.21"
validTimeHigh="30000101" validTimeLow="20110204"/>
  <synthesised>false</synthesised>
  <value xsi:type="ns2:ST" value="lying"/>
</items>
<items xsi:type="ns3:Element">
  <meaning codingRationale="" codeSystemName="Project PITES Coding System"
codeSystem="HUPH-ISCIll" code="01010101000006">
    <ns2:displayName value="Method of measurement"/>
  </meaning>
  <name codingRationale="">
    <ns2:displayName value="Method of measurement"/>
  </name>
  <rclid extension="2012:03:13:16:39:34:43" root="2.16.724.4.21"
validTimeHigh="30000101" validTimeLow="20110204"/>
  <synthesised>false</synthesised>
  <value xsi:type="ns2:ST" value="Manual, no device"/>
</items>
</members>
</content>
</allCompositions>
</ns3:EHRExtract>

```
